# Supplementary material for: A Narrative Review on the Approach to Antimicrobial Use in Ventilated Patients with Multidrug Resistant Organisms in Respiratory Samples—To Treat or Not to Treat? That Is the Question
Source: MDPI journal article supplement (doi:10.3390/antibiotics11040452), 2022-03-27
Supplement: s1 [file s1]

## Literature Search Strategy

**Database: Ovid MEDLINE(R) <1946 to March 14, 2022>**

Search Strategy:

- 
- 1 Drug Resistance/ or multidrug resistant.mp. (82522)
  - 2 Drug Resistance, Multiple, Bacterial/ or MDRO.mp. (24445)
  - 3 multidrug-resistant.mp. (35199)
  - 4 Drug Resistance, Microbial/ or Antimicrobial Resistance.mp. (80283)
  - 5 multidrug-resistant.m\_titl. (9896)
  - 6 multidrug resistant.m\_titl. (9896)
  - 7 antimicrobial resistance.m\_titl. (7143)
  - 8 MDRO.m\_titl. (26)
  - 9 Pneumonia, Ventilator-Associated/ or VAP.mp. (6702)
  - 10 VAP.m\_titl. (313)
  - 11 ventilator associated pneumonia.mp. (5132)
  - 12 ventilator associated pneumonia.m\_titl. (2540)
  - 13 decision.mp. or Clinical Decision Rules/ or Clinical Decision-Making/ or Decision Making/ (356440)
  - 14 treatment strategy.mp. (23659)
  - 15 strategy.mp. (492952)
  - 16 decision.m\_titl. (48261)
  - 17 strategy.m\_titl. (56222)
  - 18 interpretation.mp. (323180)
  - 19 interpretation.m\_titl. (24540)
  - 20 1 or 2 or 3 or 4 or 5 or 6 or 7 or 8 (169130)
  - 21 9 or 10 or 11 or 12 (8138)
  - 22 13 or 14 or 15 or 16 or 17 or 18 or 19 (1135838)
  - 23 20 and 21 and 22 (68)

\*\*\*\*\*

88 articles found

**PUBMED 1951 to March 14, 2022**

((drug resistance) OR (multidrug resistant) OR (MDRO) OR (multidrug resistant organism) OR (multidrug-resistant) OR (antimicrobial resistance)) AND ((VAP) OR (ventilator-associated pneumonia) OR (ventilator associated pneumonia) OR (ventilator associated tracheobronchitis)) AND ((decision) OR (decision making) OR (clinical decision rules) OR (treatment strategy) OR (strategy) OR (interpretation))

330 articles found
